# Supplementary material for: Stem Photosynthesis—A Key Element of Grass Pea (Lathyrus sativus L.) Acclimatisation to Salinity
Source: PubMed Central journal article supplement (PMC7828162; doi:10.3390/ijms22020685), 2021-01-12
Supplement: ijms-22-00685-s001.pdf [file ijms-22-00685-s001.pdf]

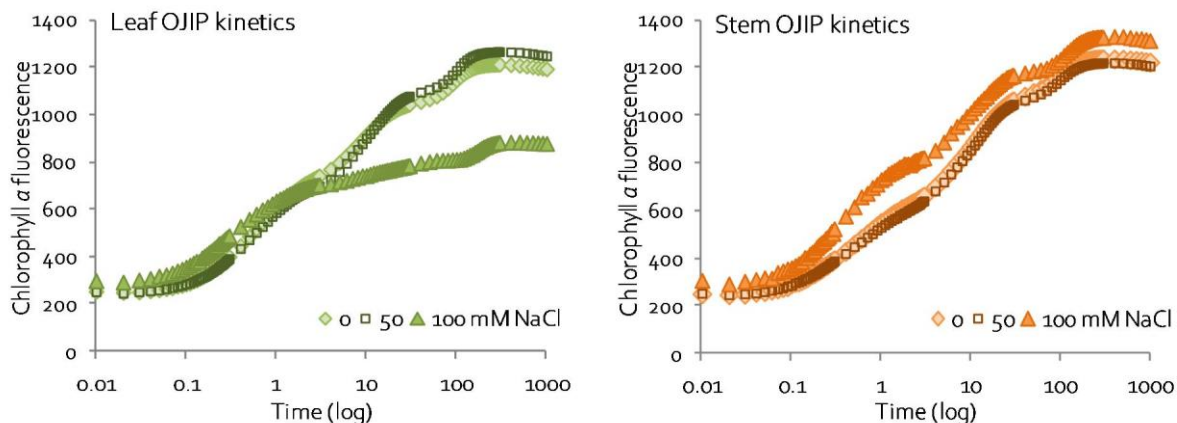

**Figure S1.** Reaction of grass pea leaf and stem photosynthetic apparatus to salinity. The fast chlorophyll *a* fluorescence transient (OJIP kinetics) of grass pea leaves and stems after 25 days of cultivation under 0, 50 and 100 mM NaCl

**Table S1.** Raw value of Fv/Fm (the maximum quantum yield of PSII) of grass pea leaf and stem photosynthetic apparatus after 25 days of cultivation under 0, 50 and 100 mM NaCl

| NaCl [Mm] | Fv/Fm value             |                         |
|-----------|-------------------------|-------------------------|
|           | Leaf                    | Stem                    |
| 0         | 0.81 <sup>a</sup> ±0.01 | 0.81 <sup>a</sup> ±0.01 |
| 50        | 0.82 <sup>a</sup> ±0.01 | 0.81 <sup>a</sup> ±0.01 |
| 100       | 0.78 <sup>b</sup> ±0.05 | 0.81 <sup>a</sup> ±0.01 |

**Table S2.** FTIR bands assignment to biomolecules ( $\nu$  – stretching and  $\delta$  - bending modes) [49-53].

|             | IR band position [cm <sup>-1</sup> ] | Assignment                                            |
|-------------|--------------------------------------|-------------------------------------------------------|
| LIPIDS      | 3012                                 | =C-H, $\nu$ (=CH)                                     |
|             | 2960                                 | -CH <sub>3</sub> , $\nu$ (-C-H)                       |
|             | 2936-2924                            | -CH <sub>2</sub> , $\nu_{as}$ (-C-H)                  |
|             | 2855-2851                            | -CH <sub>2</sub> , $\nu_s$ (-C-H)                     |
|             | 1740                                 | Triacylglycerols, $\nu$ (C=O)                         |
|             | 1716                                 | Free fatty acids, $\nu$ (C=O)                         |
| PROTEINS    | 1680                                 | Amide I, $\beta$ -turn, $\nu$ (C=O)                   |
|             | 1654                                 | Amide I, $\alpha$ -helix, $\nu$ (C=O)                 |
|             | 1633                                 | Amide I, $\beta$ -sheet, $\nu$ (C=O)                  |
|             | 1548/1541                            | Amide II, $\delta$ (N-H)/ $\nu$ (C-N)                 |
|             | 1516                                 | Tyrosine                                              |
| SACCHARIDES | 1076                                 | Saccharides, $\nu$ (C-O)/ $\nu$ (C-C)                 |
|             | 1048                                 | Saccharose, fructose, $\nu$ (C-O)                     |
|             | 1021                                 | Saccharides, $\nu$ (C-O)                              |
|             | 990                                  | Starch, saccharose, glucose, $\nu$ (C-O)/ $\nu$ (C-C) |
|             | 944                                  | Saccharose, $\delta$ (CH <sub>2</sub> )               |
|             | 921                                  | Saccharides, $\delta$ (CCO)                           |

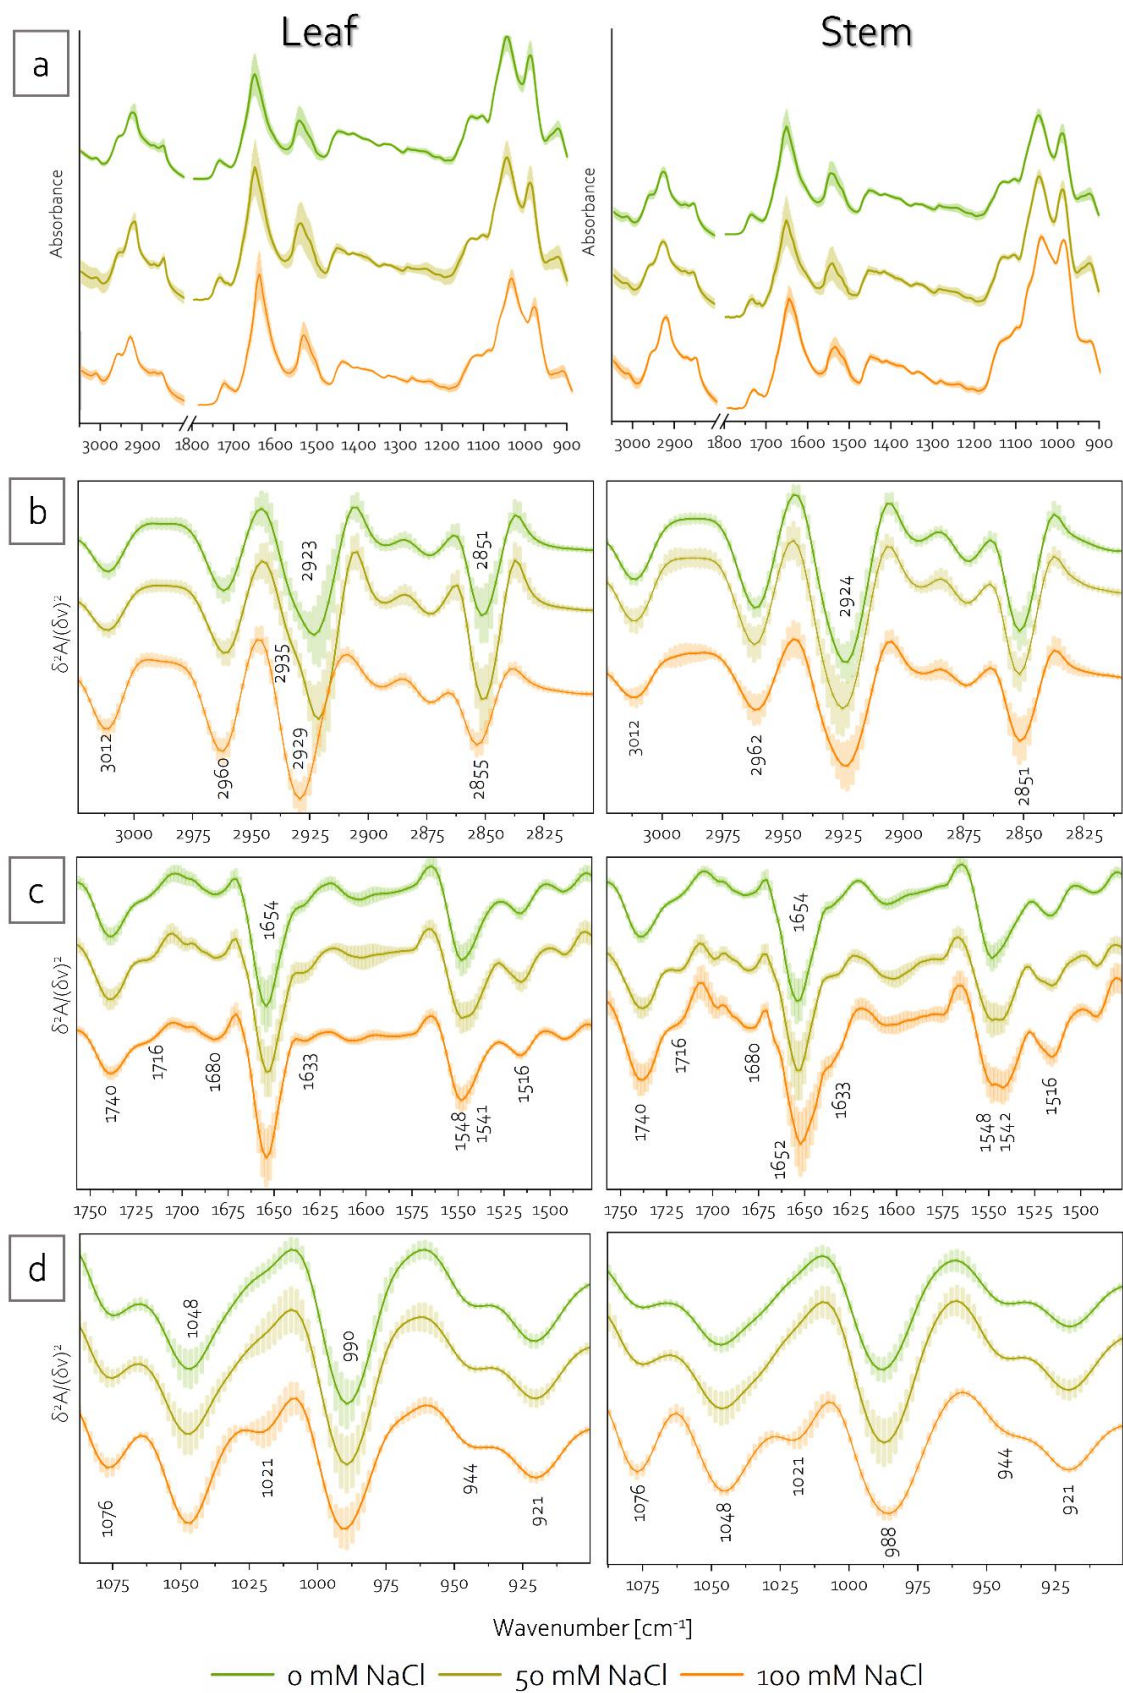

**Figure S2.** Averaged raw ATR FTIR spectra (a) and their second derivatives with peak labelling in the regions specific for (b) fatty acids (3050 – 2800  $\text{cm}^{-1}$ ), (c) triacylglycerols, fatty acids and proteins (1750 – 1480  $\text{cm}^{-1}$ ) and (d) sugars (1100 – 900  $\text{cm}^{-1}$ ). Shading of spectra denotes standard deviation ( $n = 3$ ).
